# Supplementary material
Source: PubMed Central journal article supplement (PMC3119113)

# Supplementary Figure 1

**Treatment  
Experiment**

+/- 2% DSS

+/- 2% DSS  
and  
+/- PBS  
or  
Cl-Amidine

Daily  
Oral Gavage

Harvest Colon

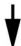

0

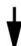

7

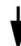

14

Time (days)

+/- PBS  
or  
Cl-Amidine

+/- 2% DSS  
and  
+/- PBS  
or  
Cl-Amidine

Harvest Colon

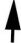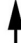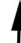

**Prevention  
Experiment**

Daily i.p. injection

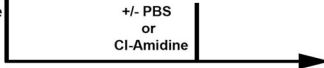

Supplement: supp_00435.2010_figS1.pdf [file supp_00435.2010_figS1.pdf]
