# Supplementary material
Source: PubMed Central journal article supplement (PMC3119113)

**Supplementary Figure 2**

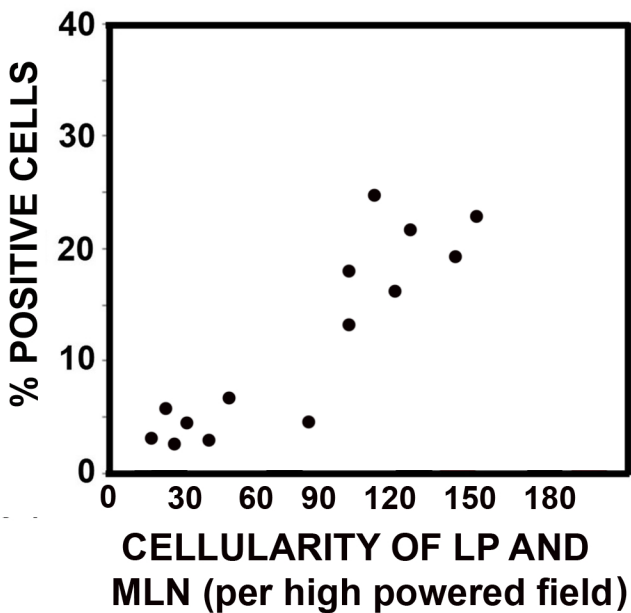

Supplement: supp_00435.2010_figS2.pdf [file supp_00435.2010_figS2.pdf]

# Supplementary Figure 3

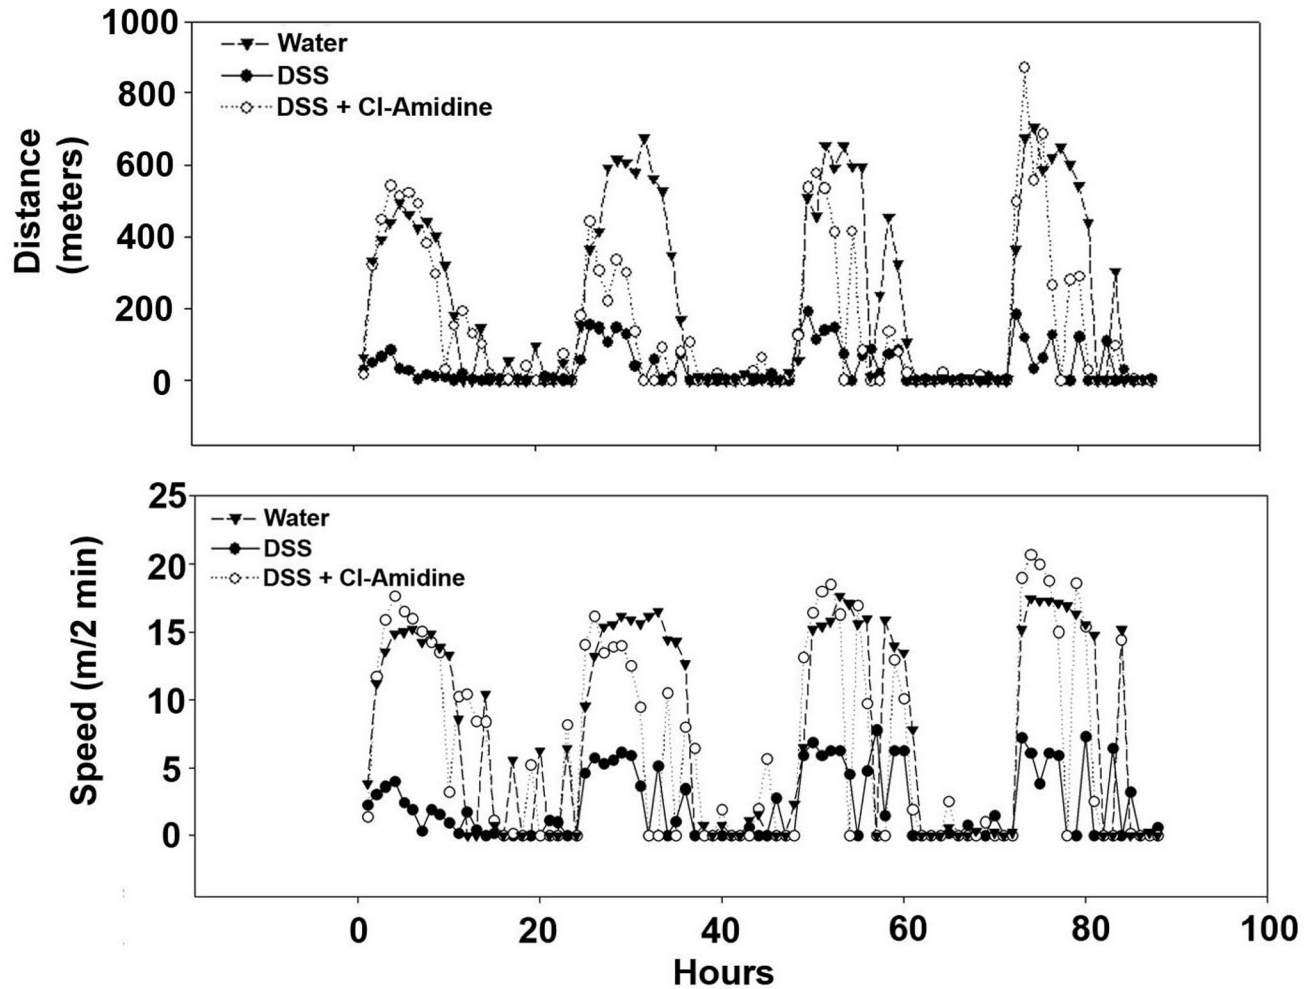

Supplement: supp_00435.2010_figS3.pdf [file supp_00435.2010_figS3.pdf]

# Supplementary Figure 4

## Spleen

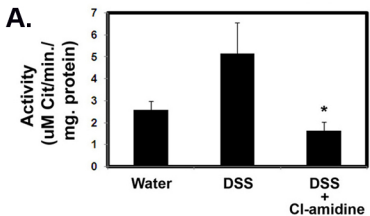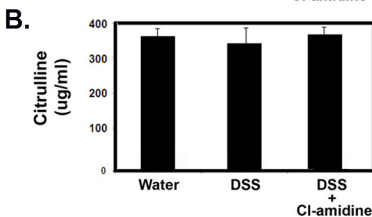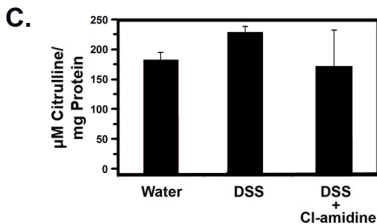

Supplement: supp_00435.2010_figS4.pdf [file supp_00435.2010_figS4.pdf]

0 ug

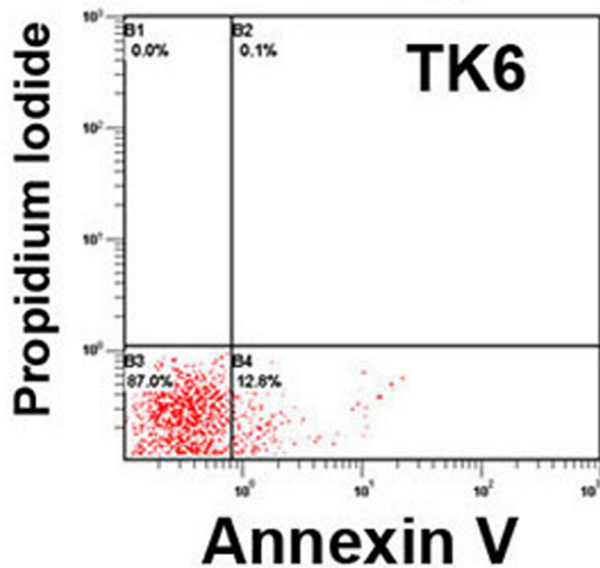

25 ug

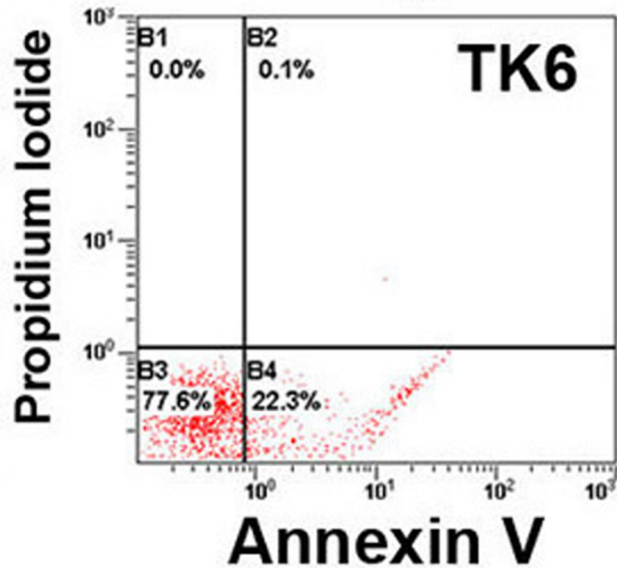

Supplement: supp_00435.2010_figS5.pdf [file supp_00435.2010_figS5.pdf]
